# Supplementary material
Source: PubMed Central journal article supplement (PMC8218647)
Supplement: aac.02696-20-s0001.pdf [file aac.02696-20-s0001.pdf]

## **Supplementary Figure and Tables**

Gene-gene interactions dictate ciprofloxacin resistance in *P. aeruginosa* and facilitate prediction of resistance phenotype from genome sequence data.

Attika Rehman, Julie Jeukens, Roger C Levesque and Iain L Lamont.

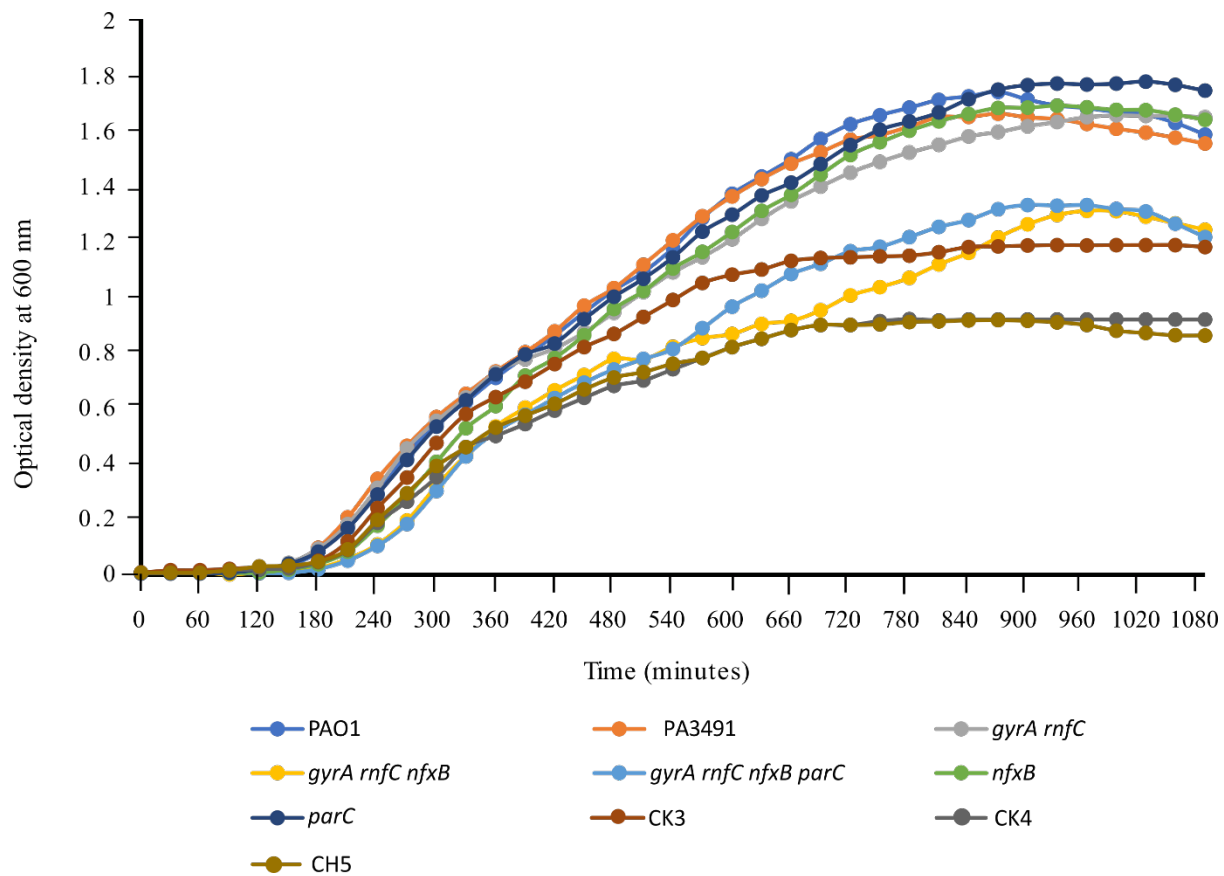

**Figure S1: Growth of engineered and lab evolved mutants.** Bacteria were grown in L-broth and A600 measured (on y-axis) at 30-minute intervals (on x-axis). Mean value of ODs of 3 biological replicates are shown.

**Table S1: Ciprofloxacin MICs of mutants of *P. aeruginosa* PAO1.**

| Strain                                                                                                                   | *MIC (mg/L) |
|--------------------------------------------------------------------------------------------------------------------------|-------------|
| PAO1 wild-type                                                                                                           | 0.06265 (S) |
| <b>Experimentally evolved mutants</b>                                                                                    |             |
| PAO1-CF3 <i>gyrA</i> <sub>T831</sub> <i>nfxB</i> <sub>T39P</sub> <i>rnfC</i> <sub>H87P</sub>                             | 4 (R)       |
| PAO1-CF3 <i>gyrA</i> <sub>T831</sub> <i>nfxB</i> <sub>T39P</sub> <i>rnfC</i> <sub>H87P</sub>                             | 4 (R)       |
| PAO1-CK3 <i>gyrA</i> <sub>T831</sub> <i>nfxB</i> <sub>T39P</sub> <i>rnfC</i> <sub>H87P</sub>                             | 4 (R)       |
| PAO1-CC6 <i>gyrA</i> <sub>T831</sub> <i>nfxB</i> <sub>T39P</sub> <i>rnfC</i> <sub>H87P</sub> <i>parC</i> <sub>S87L</sub> | 32 (R)      |
| PAO1-CH5 <i>gyrA</i> <sub>T831</sub> <i>nfxB</i> <sub>T39P</sub> <i>rnfC</i> <sub>H87P</sub> <i>parC</i> <sub>S87L</sub> | 32 (R)      |
| PAO1-CI5 <i>gyrA</i> <sub>T831</sub> <i>nfxB</i> <sub>T39P</sub> <i>rnfC</i> <sub>H87P</sub> <i>parC</i> <sub>S87L</sub> | 32 (R)      |
| PAO1-CK4 <i>gyrA</i> <sub>T831</sub> <i>nfxB</i> <sub>T39P</sub> <i>rnfC</i> <sub>H87P</sub> <i>parC</i> <sub>S87L</sub> | 32 (R)      |
| <b>Engineered mutants</b>                                                                                                |             |
| PAO1 <i>gyrA</i> <sub>T831</sub>                                                                                         | 1 (I)       |
| PAO1 <i>gyrA</i> <sub>D87G</sub>                                                                                         | 0.5 (S)     |
| PAO1 <i>gyrA</i> <sub>D87N</sub>                                                                                         | 0.25 (S)    |
| PAO1 <i>nfxB</i> <sub>T39P</sub>                                                                                         | 0.0625 (S)  |
| PAO1 <i>rnfC</i> <sub>H87P</sub>                                                                                         | 0.0625 (S)  |
| PAO1 <i>parC</i> <sub>S87L</sub>                                                                                         | 0.0625 (S)  |
| PAO1 <i>parE</i> <sub>V460G</sub>                                                                                        | 0.0625 (S)  |
| PAO1 <i>rnfC</i> <sub>H87P</sub> <i>nfxB</i> <sub>T39P</sub>                                                             | 0.0625 (S)  |
| PAO1 <i>rnfC</i> <sub>H87P</sub> <i>nfxB</i> <sub>T39P</sub> <i>parC</i> <sub>S87L</sub>                                 | 0.0625 (S)  |
| PAO1 <i>rnfC</i> <sub>H87P</sub> <i>nfxB</i> <sub>T39P</sub> <i>parE</i> <sub>V460G</sub>                                | 0.0625 (S)  |
|                                                                                                                          |             |
|                                                                                                                          |             |
| PAO1-CH5 <i>nfxB</i> <sub>T39P</sub> <i>rnfC</i> <sub>H87P</sub> <i>parC</i> <sub>S87L</sub> GyrA <sup>+</sup> knock-in  | 0.25 (S)    |
| PAO1-CK4 <i>nfxB</i> <sub>T39P</sub> <i>rnfC</i> <sub>H87P</sub> <i>parC</i> <sub>S87L</sub> GyrA <sup>+</sup> knock-in  | 0.25 (S)    |
| PAO1 <i>gyrA</i> <sub>T831</sub> <i>parC</i> <sub>S87L</sub>                                                             | 4 (R)       |
| PAO1 <i>gyrA</i> <sub>T831</sub> <i>parE</i> <sub>V460G</sub>                                                            | 2 (R)       |
| PAO1 <i>gyrA</i> <sub>T831</sub> <i>rnfC</i> <sub>H87P</sub>                                                             | 1 (I)       |
| PAO1 <i>gyrA</i> <sub>T831</sub> <i>nfxB</i> <sub>T39P</sub>                                                             | 1 (I)       |
| **PAO1 <i>gyrA</i> <sub>T831</sub> <i>nfxB</i> <sub>T39P</sub> <i>rnfC</i> <sub>H87P</sub>                               | 4 (R)       |
|                                                                                                                          |             |

|                                                                                                                        |        |
|------------------------------------------------------------------------------------------------------------------------|--------|
| PAO1 <i>gyrA</i> <sub>T831</sub> <i>parC</i> <sub>S87L</sub> <i>rnfC</i> <sub>H87P</sub>                               | 4 (R)  |
| PAO1 <i>gyrA</i> <sub>T831</sub> <i>nfxB</i> <sub>T39P</sub> <i>parC</i> <sub>S87L</sub>                               | 4 (R)  |
| PAO1 <i>gyrA</i> <sub>T831</sub> <i>nfxB</i> <sub>T39P</sub> <i>parE</i> <sub>V460G</sub>                              | 4 (R)  |
| **Knock in WT <i>rnfC</i> in PAO1-CK3                                                                                  | 2 (R)  |
| **PAO1 <i>gyrA</i> <sub>T831</sub> <i>nfxB</i> <sub>T39P</sub> <i>rnfC</i> <sub>H87P</sub> <i>parC</i> <sub>S87L</sub> | 32 (R) |
| PAO1 <i>gyrA</i> <sub>T831</sub> <i>nfxB</i> <sub>T39P</sub> <i>rnfC</i> <sub>H87P</sub> <i>parE</i> <sub>V460G</sub>  | 32 (R) |

\*S denotes Susceptible, I denotes Intermediate and R denotes Resistant strains. \*\* Mutants constructed twice, with the same MIC each time.

**Table S2. Relative quantification of *mexD* in different mutants\***

| Strain                                                         | Replicate 1 | Replicate 2 | Replicate 3 | SEM    |
|----------------------------------------------------------------|-------------|-------------|-------------|--------|
| PAO1                                                           | 3.81E-3     | 3.01E-3     | 2.83E-3     | 0.0003 |
| PAO1 <i>gyrA</i> <sub>T83I</sub>                               | 4.23E-3     | 3.60E-3     | 3.60E-3     | 0.0002 |
| PAO1 <i>nfxB</i> <sub>T39P</sub>                               | 0.1150      | 0.2016      | 0.1222      | 0.027  |
| PAO1 <i>gyrA</i> <sub>T83I</sub> , <i>nfxB</i> <sub>T39P</sub> | 0.1114      | 0.1855      | 0.1215      | 0.023  |

\*Expression of *mexD* was quantified by RT-qPCR using the method described in the text. Values represent target/reference ratios of crossing points after normalisation of data in three biological replicates. SEM denotes standard error of the mean.

**Table S3: Tukey's HSD (Honestly significant difference) test p-values for multiple comparison of expression of *mexD* between mutants\***

|                   | PAO1           | <i>gyrA</i>    | <i>nfxB</i> |
|-------------------|----------------|----------------|-------------|
| PAO1              |                |                |             |
| <i>gyrA</i>       | 1.00           |                |             |
| <i>nfxB</i>       | <b>0.00429</b> | <b>0.00446</b> |             |
| <i>gyrA, nfxB</i> | <b>0.00665</b> | <b>0.00691</b> | 0.9         |

\* Input values are from Table S2. Significant p-values ( $p < 0.01$ ) are shown in bold text.

**Table S4: Average area under the growth curve of engineered mutants.**

| <b>Engineered mutants</b>  | <b>Area under curve</b> | <b>Average area under curve</b> | <b>±SEM</b> |
|----------------------------|-------------------------|---------------------------------|-------------|
| PAO1 wildtype              | 1112.477                | 1123.2                          | 6.2         |
|                            | 1134.12                 |                                 |             |
|                            | 1122.9                  |                                 |             |
| <i>rnfC</i>                | 1129                    | 1106.4                          | 16.3        |
|                            | 1115.29                 |                                 |             |
|                            | 1074.7                  |                                 |             |
| <i>nfxB</i>                | 1049.6                  | 1040.5                          | 5.7         |
|                            | 1030                    |                                 |             |
|                            | 1042                    |                                 |             |
| <i>parC</i>                | 1125                    | 1102                            | 18.6        |
|                            | 1115                    |                                 |             |
|                            | 1065                    |                                 |             |
| <i>gyrA+rnfC</i>           | 1021                    | 1041.4                          | 18.8        |
|                            | 1079.04                 |                                 |             |
|                            | 1024.12                 |                                 |             |
| <i>gyrA+rnfC+nfxB</i>      | 721.45                  | 784.7                           | 32.5        |
|                            | 803.64                  |                                 |             |
|                            | 829.04                  |                                 |             |
| <i>gyrA+rnfC+nfxB+parC</i> | 851.78                  | 820.5                           | 18.4        |
|                            | 788.08                  |                                 |             |
|                            | 821.51                  |                                 |             |

**Table S5.** Mutations in experimentally-evolved PA14.

| Genes                                          | Mutant strain* |         |          |                         |         |
|------------------------------------------------|----------------|---------|----------|-------------------------|---------|
|                                                | PA14_CB4       | PA14_C2 | PA14_CC4 | PA14_D2                 | PA14_E4 |
| <i>gyrA</i>                                    | T83I           |         | T83I     |                         | T83A    |
| <i>gyrB</i>                                    | Δ 6 bp         |         |          | (TCC) <sub>2 to 3</sub> |         |
| <i>parC</i>                                    | S87L           |         | S87L     |                         |         |
| <i>nfxB</i>                                    |                |         | Y101*    |                         | Δ 13 bp |
| <i>mexS</i><br>(PA14_32420,<br>Oxidoreductase) |                | Δ 11 bp |          | Δ 11 bp                 |         |
| <i>parE</i>                                    | P394L          |         |          |                         |         |

\*\*Five independent ciprofloxacin-resistant mutants of *P. aeruginosa* PA14 were evolved using the gradient selection method (1). Mutations were identified following whole genome sequencing and comparison with the parental PA14 genome. Mutations known to be related to ciprofloxacin resistance are listed.

**Table S6: *P. aeruginosa* isolates and genomes used in this study**

| <b>Isolates IDs</b> | <b>*BioProject</b> | <b>Host</b> | <b>Isolate_country</b> |
|---------------------|--------------------|-------------|------------------------|
| 37                  | PRJNA325248        | Human       | Canada                 |
| 38                  | PRJNA325248        | Human       | Canada                 |
| 65                  | PRJNA325248        | Human       | Canada                 |
| 66                  | PRJNA325248        | Human       | Canada                 |
| 88                  | PRJNA325248        | Human       | Denmark                |
| 89                  | PRJNA294726        | Human       | Belgium                |
| 90                  | PRJNA325248        | Human       | USA                    |
| 111                 | PRJNA325248        | Human       | Canada                 |
| 112                 | PRJNA325248        | Human       | Canada                 |
| 113                 | PRJNA325248        | Human       | Canada                 |
| 114                 | PRJNA325248        | Human       | Canada                 |
| 115                 | PRJNA325248        | Human       | Canada                 |
| 116                 | PRJNA325248        | Human       | Canada                 |
| 117                 | PRJNA325248        | Human       | Canada                 |
| 118                 | PRJNA325248        | Human       | Canada                 |
| 119                 | PRJNA325248        | Human       | Canada                 |
| 120                 | PRJNA325248        | Human       | Canada                 |
| 121                 | PRJNA325248        | Human       | Canada                 |
| 122                 | PRJNA325248        | Human       | Canada                 |
| 123                 | PRJNA325248        | Human       | Canada                 |
| 124                 | PRJNA325248        | Human       | Canada                 |
| 125                 | PRJNA325248        | Human       | Canada                 |
| 126                 | PRJNA325248        | Human       | Canada                 |
| 127                 | PRJNA325248        | Human       | Canada                 |
| 128                 | PRJNA325248        | Human       | Canada                 |
| 129                 | PRJNA325248        | Human       | Canada                 |
| 130                 | PRJNA325248        | Human       | Canada                 |
| 131                 | PRJNA325248        | Human       | Canada                 |
| 132                 | PRJNA325248        | Human       | Canada                 |
| 133                 | PRJNA325248        | Human       | Canada                 |



| <b>Isolates IDs</b> | <b>*BioProject</b> | <b>Host</b> | <b>Isolate_country</b> |
|---------------------|--------------------|-------------|------------------------|
| 134                 | PRJNA325248        | Human       | Canada                 |
| 135                 | PRJNA325248        | Human       | Canada                 |
| 139                 | PRJNA325248        | Human       | Canada                 |
| 140                 | PRJNA325248        | Human       | Canada                 |
| 141                 | PRJNA325248        | Human       | Canada                 |
| 142                 | PRJNA325248        | Human       | Canada                 |
| 143                 | PRJNA325248        | Human       | Canada                 |
| 144                 | PRJNA325248        | Human       | Canada                 |
| 145                 | PRJNA325248        | Human       | Canada                 |
| 146                 | PRJNA325248        | Human       | Canada                 |
| 147                 | PRJNA325248        | Human       | Canada                 |
| 148                 | PRJNA325248        | Human       | Canada                 |
| 149                 | PRJNA325248        | Human       | Canada                 |
| 150                 | PRJNA325248        | Human       | Canada                 |
| 151                 | PRJNA325248        | Human       | Canada                 |
| 152                 | PRJNA325248        | Human       | Canada                 |
| 153                 | PRJNA325248        | Human       | Canada                 |
| 154                 | PRJNA325248        | Human       | Canada                 |
| 155                 | PRJNA325248        | Human       | Canada                 |
| 156                 | PRJNA325248        | Human       | Canada                 |
| 157                 | PRJNA325248        | Human       | Canada                 |
| 158                 | PRJNA325248        | Human       | Canada                 |
| 159                 | PRJNA325248        | Human       | Canada                 |
| 161                 | PRJNA325248        | Human       | Canada                 |
| 162                 | PRJNA325248        | Human       | Canada                 |
| 163                 | PRJNA325248        | Human       | Canada                 |
| 164                 | PRJNA325248        | Human       | Canada                 |
| 166                 | PRJNA325248        | Human       | Canada                 |
| 167                 | PRJNA325248        | Human       | Canada                 |
| 168                 | PRJNA325248        | Human       | Canada                 |
| 169                 | PRJNA325248        | Human       | Canada                 |
| 170                 | PRJNA325248        | Human       | Canada                 |

| <b>Isolates IDs</b> | <b>*BioProject</b> | <b>Host</b>          | <b>Isolate_country</b> |
|---------------------|--------------------|----------------------|------------------------|
| 171                 | PRJNA325248        | Human                | Canada                 |
| 172                 | PRJNA325248        | Human                | Canada                 |
| 173                 | PRJNA325248        | Human                | Canada                 |
| 174                 | PRJNA325248        | Human                | Canada                 |
| 175                 | PRJNA325248        | Human                | Canada                 |
| 176                 | PRJNA325248        | Human                | Canada                 |
| 177                 | PRJNA325248        | Human                | Canada                 |
| 178                 | PRJNA325248        | Human                | Canada                 |
| 179                 | PRJNA325248        | Human                | Canada                 |
| 180                 | PRJNA325248        | Human                | Canada                 |
| 181                 | PRJNA325248        | Human                | Canada                 |
| 182                 | PRJNA325248        | Human                | Canada                 |
| 183                 | PRJNA325248        | Human                | Canada                 |
| 184                 | PRJNA325248        | Human                | Canada                 |
| 185                 | In process         | Human                | Canada                 |
| 186                 | In process         | Human                | Canada                 |
| 369                 | PRJNA325248        | Environmental        | Australia              |
| 532                 | PRJNA325248        | Human                | Australia              |
| 534                 | PRJNA325248        | Human                | Australia              |
| 664                 | PRJNA325248        | Hospital Environment | Columbia               |
| 669                 | PRJNA325248        | Human                | Panama                 |
| 677                 | PRJNA325248        | Human                | Bulgaria               |
| 688                 | PRJNA325248        | Human                | France                 |
| 689                 | PRJNA325248        | Human                | France                 |
| 690                 | PRJNA325248        | Human                | France                 |
| 691                 | PRJNA325248        | Human                | France                 |
| 692                 | PRJNA325248        | Human                | France                 |
| 693                 | PRJNA325248        | Human                | France                 |
| 694                 | PRJNA325248        | Human                | France                 |
| 695                 | PRJNA325248        | Human                | France                 |
| 696                 | PRJNA325248        | Animal               | France                 |
| 698                 | PRJNA325248        | Environmental        | Mexico                 |

| <b>Isolates IDs</b> | <b>*BioProject</b> | <b>Host</b>      | <b>Isolate_country</b> |
|---------------------|--------------------|------------------|------------------------|
| 699                 | PRJNA325248        | Environmental    | Belgium                |
| 700                 | PRJNA325248        | clinical isolate | Canada                 |
| 703                 | PRJNA325248        | Plant            | United Kingdom         |
| 705                 | PRJNA325248        | Human            | Georgian Republic      |
| 706                 | PRJNA325248        | Human            | Georgian Republic      |
| 710                 | PRJNA325248        | Human            | Belgium                |
| 713                 | PRJNA325248        | Human            | Belgium                |
| 714                 | PRJNA294726        | Human            | Belgium                |
| 715                 | PRJNA325248        | Human            | Canada                 |
| 718                 | PRJNA325248        | Human            | Colombia               |
| 720                 | PRJNA325248        | Animal           | India                  |
| 723                 | PRJNA325248        | Animal           | United Kingdom         |
| 725                 | PRJNA325248        | Animal           | United Kingdom         |
| 727                 | PRJNA325248        | Human            | USA                    |
| 728                 | PRJNA325248        | Human            | United Kingdom         |
| 729                 | PRJNA325248        | Human            | United Kingdom         |
| 730                 | PRJNA325248        | Human            | United Kingdom         |
| 731                 | PRJNA325248        | Human            | United Kingdom         |
| 733                 | PRJNA325248        | Human            | USA                    |
| 734                 | PRJNA325248        | Human            | United Kingdom         |
| 736                 | PRJNA325248        | Human            | United Kingdom         |
| 737                 | PRJNA325248        | Human            | United Kingdom         |
| 738                 | PRJNA325248        | Human            | United Kingdom         |
| 740                 | PRJNA325248        | Environmental    | Tunisia                |
| 742                 | PRJNA325248        | Animal           | USA                    |
| 744                 | PRJNA325248        | Animal           | USA                    |
| 747                 | PRJNA325248        | Environmental    | Japan                  |
| 748                 | PRJNA325248        | Environmental    | Japan                  |
| 749                 | PRJNA325248        | Environmental    | Japan                  |
| 750                 | PRJNA325248        | Environmental    | Japan                  |
| 751                 | PRJNA325248        | Environmental    | Japan                  |
| 752                 | PRJNA325248        | Environmental    | Japan                  |

| <b>Isolates IDs</b> | <b>*BioProject</b> | <b>Host</b>   | <b>Isolate_country</b> |
|---------------------|--------------------|---------------|------------------------|
| 754                 | PRJNA325248        | Environmental | Japan                  |
| 755                 | PRJNA325248        | Environmental | Japan                  |
| 756                 | PRJNA325248        | Animal        | Japan                  |
| 757                 | PRJNA325248        | Environmental | Japan                  |
| 758                 | PRJNA325248        | Environmental | Japan                  |
| 759                 | PRJNA325248        | Environmental | Japan                  |
| 760                 | PRJNA325248        | Environmental | Japan                  |
| 761                 | PRJNA325248        | Environmental | Japan                  |
| 762                 | PRJNA325248        | Environmental | Japan                  |
| 769                 | In process         | Animal        | Portugal               |
| 775                 | PRJNA325248        | Animal        | Portugal               |
| 776                 | PRJNA325248        | Animal        | Portugal               |
| 780                 | PRJNA325248        | Animal        | Portugal               |
| 782                 | PRJNA325248        | Animal        | Portugal               |
| 785                 | PRJNA325248        | Animal        | Portugal               |
| 786                 | PRJNA325248        | Animal        | Portugal               |
| 789                 | PRJNA325248        | Animal        | Portugal               |
| 790                 | PRJNA325248        | Animal        | Portugal               |
| 792                 | In process         | Animal        | Portugal               |
| 796                 | PRJNA325248        | Animal        | Portugal               |
| 797                 | PRJNA325248        | Animal        | Portugal               |
| 810                 | PRJNA294726        | Human         | United Kingdom         |
| 811                 | PRJNA294726        | Human         | United Kingdom         |
| 824                 | PRJNA325248        | Environmental | Belgium                |
| 825                 | PRJNA325248        | Environmental | Belgium                |
| 826                 | PRJNA325248        | Environmental | Belgium                |
| 828                 | PRJNA325248        | Environmental | Belgium                |
| 830                 | PRJNA325248        | Environmental | Belgium                |
| 831                 | PRJNA325248        | Environmental | Belgium                |
| 838                 | PRJNA325248        | Human         | Belgium                |
| 852                 | PRJNA294726        | Human         | United Kingdom         |
| 856                 | PRJNA325248        | Human         | USA                    |

| <b>Isolates IDs</b> | <b>*BioProject</b> | <b>Host</b>   | <b>Isolate_country</b> |
|---------------------|--------------------|---------------|------------------------|
| 858                 | PRJNA325248        | Human         | Germany                |
| 860                 | PRJNA325248        | Human         | USA                    |
| 867                 | PRJNA325248        | Human         | USA                    |
| 871                 | PRJNA294726        | Human         | Belgium                |
| 875                 | PRJNA325248        | Environmental | Benin                  |
| 877                 | PRJNA325248        | Environmental | Puerto Rico            |
| 878                 | PRJNA325248        | Environmental | Puerto Rico            |
| 879                 | PRJNA325248        | Human         | Congo                  |
| 880                 | PRJNA325248        | Human         | Philippines            |
| 881                 | PRJNA325248        | Environmental | Germany                |
| 884                 | PRJNA325248        | Human         | Tunisia                |
| 885                 | PRJNA325248        | Human         | Tunisia                |
| 934                 | PRJNA325248        | Human         | Australia              |
| 946                 | PRJNA325248        | Human         | Australia              |
| 948                 | PRJNA325248        | Human         | Australia              |
| 954                 | PRJNA325248        | Human         | Australia              |
| 976                 | PRJNA325248        | Human         | Australia              |
| 977                 | PRJNA325248        | Human         | Australia              |
| 1053                | PRJNA325248        | Human         | United Kingdom         |
| 1074                | PRJNA325248        | Human         | United Kingdom         |
| 1108                | PRJNA325248        | Human         | Thailand               |
| 1112                | PRJNA325248        | Human         | Thailand               |
| 1124                | PRJNA325248        | Human         | Thailand               |
| 1130                | PRJNA325248        | Human         | Thailand               |
| 1133                | PRJNA325248        | Human         | Thailand               |
| 1152                | PRJNA325248        | Human         | Thailand               |
| 1180                | PRJNA325248        | Human         | USA                    |
| 1182                | PRJNA325248        | Human         | USA                    |
| 1184                | PRJNA325248        | Human         | USA                    |
| 1241                | PRJNA325248        | Human         | Brazil                 |
| 1242                | PRJNA325248        | Human         | Brazil                 |
| 1243                | PRJNA325248        | Human         | Brazil                 |

| <b>Isolates IDs</b> | <b>*BioProject</b> | <b>Host</b> | <b>Isolate_country</b> |
|---------------------|--------------------|-------------|------------------------|
| 1244                | PRJNA325248        | Human       | Brazil                 |
| 1245                | PRJNA325248        | Human       | Brazil                 |
| 1269                | PRJNA325248        | Human       | France                 |
| 1296                | PRJNA325248        | Human       | United Kingdom         |
| 1506                | PRJNA325248        | Human       | Canada                 |
| 1530                | PRJNA326244        | Human       | Italy                  |
| 1532                | PRJNA326244        | Human       | Italy                  |
| 1533                | PRJNA326244        | Human       | Italy                  |
| 1534                | PRJNA326244        | Human       | Italy                  |
| 1535                | PRJNA326244        | Human       | Italy                  |
| 1536                | PRJNA326244        | Human       | Italy                  |
| 1537                | PRJNA326244        | Human       | Italy                  |
| 1538                | PRJNA326244        | Human       | Italy                  |
| 1539                | PRJNA326244        | Human       | Italy                  |
| 1540                | PRJNA326244        | Human       | Italy                  |
| 1541                | PRJNA326244        | Human       | Italy                  |
| 1542                | PRJNA326244        | Human       | Italy                  |
| 1543                | PRJNA326244        | Human       | Italy                  |
| 1544                | PRJNA326244        | Human       | Italy                  |
| 1545                | PRJNA326244        | Human       | Italy                  |
| 1546                | PRJNA326244        | Human       | Italy                  |
| 1547                | PRJNA326244        | Human       | Italy                  |
| 1548                | PRJNA326244        | Human       | Italy                  |
| 1549                | PRJNA326244        | Human       | Italy                  |
| 1550                | PRJNA326244        | Human       | Italy                  |
| 1551                | PRJNA326244        | Human       | Italy                  |
| 1553                | PRJNA326244        | Human       | Italy                  |
| 1554                | PRJNA326244        | Human       | Italy                  |
| 1555                | PRJNA326244        | Human       | Italy                  |
| 1557                | PRJNA326244        | Human       | Italy                  |
| 1558                | PRJNA326244        | Human       | Italy                  |
| 1559                | PRJNA326244        | Human       | Italy                  |

| <b>Isolates IDs</b> | <b>*BioProject</b> | <b>Host</b> | <b>Isolate_country</b> |
|---------------------|--------------------|-------------|------------------------|
| 1560                | PRJNA326244        | Human       | Italy                  |
| 1561                | PRJNA326244        | Human       | Italy                  |
| 1562                | PRJNA326244        | Human       | Italy                  |
| 1563                | PRJNA326244        | Human       | Italy                  |
| 1564                | PRJNA326244        | Human       | Italy                  |
| 1565                | PRJNA326244        | Human       | Italy                  |
| 1576                | PRJNA325248        | Human       | USA                    |
| 1577                | PRJNA325248        | Human       | USA                    |
| 1578                | PRJNA325248        | Human       | USA                    |
| 1579                | PRJNA325248        | Human       | USA                    |
| 1580                | PRJNA325248        | Human       | USA                    |
| 1581                | PRJNA325248        | Human       | USA                    |
| 1582                | PRJNA325248        | Human       | USA                    |
| 1590                | PRJNA325248        | Human       | Canada                 |
| 1594                | PRJNA325248        | Human       | Canada                 |
| 1603                | PRJNA325248        | Human       | Canada                 |
| 1252420             | PRJNA649313        | Human       | Australia              |
| 1254434             | PRJNA649313        | Human       | Australia              |
| 1255885             | PRJNA649313        | Human       | Chile                  |
| 1257147             | PRJNA649313        | Human       | Argentina              |
| 1257763             | PRJNA649313        | Human       | Italy                  |
| 1260410             | PRJNA649313        | Human       | Czech Republic         |
| 1260715             | PRJNA649313        | Human       | Turkey                 |
| 1260990             | PRJNA649313        | Human       | Greece                 |
| 1265577             | PRJNA649313        | Human       | Poland                 |
| 1266654             | PRJNA649313        | Human       | Russia                 |
| 1268230             | PRJNA649313        | Human       | Spain                  |
| 1271047             | PRJNA649313        | Human       | Germany                |
| 1271701             | PRJNA649313        | Human       | Israel                 |
| 1271954             | PRJNA649313        | Human       | Israel                 |
| 1272032             | PRJNA649313        | Human       | Czech Republic         |
| 1275655             | PRJNA649313        | Human       | Mexico                 |

| <b>Isolates IDs</b> | <b>*BioProject</b> | <b>Host</b> | <b>Isolate_country</b> |
|---------------------|--------------------|-------------|------------------------|
| 1275666             | PRJNA649313        | Human       | Mexico                 |
| 1279293             | PRJNA649313        | Human       | United Kingdom         |
| 1280466             | PRJNA649313        | Human       | Spain                  |
| 1281476             | PRJNA649313        | Human       | United States          |
| 1292777             | PRJNA649313        | Human       | Venezuela              |
| 1295835             | PRJNA649313        | Human       | Italy                  |
| 1300097             | PRJNA649313        | Human       | Mexico                 |
| 1301482             | PRJNA649313        | Human       | Mexico                 |
| 1313352             | PRJNA649313        | Human       | Malaysia               |
| 1324459             | PRJNA649313        | Human       | Romania                |
| 1344658             | PRJNA649313        | Human       | Turkey                 |
| 1417546             | PRJNA649313        | Human       | Mexico                 |
| 1419840             | PRJNA649313        | Human       | Colombia               |
| 1420275             | PRJNA649313        | Human       | Mexico                 |
| 1423253             | PRJNA649313        | Human       | Belgium                |
| 1449019             | PRJNA649313        | Human       | United States          |
| 1459372             | PRJNA649313        | Human       | Philippines            |
| 1586981             | PRJNA649313        | Human       | Belgium                |
| 1586994             | PRJNA649313        | Human       | Belgium                |
| 1607533             | PRJNA649313        | Human       | Russia                 |
| 1679579             | PRJNA649313        | Human       | Hungary                |
| 1690076             | PRJNA649313        | Human       | Mexico                 |
| 1709299             | PRJNA649313        | Human       | Brazil                 |

\*Isolates in Bioproject PRJNA325248 were from (2), (3), (4), Project PRJNA294726 were from (5) and Project PRJNA326244 were from (6). Details of *P. aeruginosa* isolates and genome data are described in the International Pseudomonas Consortium Database (<https://ipcd.ibis.ulaval.ca>).



**Table S7.** MICs and presence or absence of genetic variations in analysed genes of *P. aeruginosa* isolates.

| Isolates with actual MIC the same as predicted MIC |                        |             |                    |                    |             |             |             |      |                                  |               |
|----------------------------------------------------|------------------------|-------------|--------------------|--------------------|-------------|-------------|-------------|------|----------------------------------|---------------|
| No analysed resistant alleles                      |                        |             |                    |                    |             |             |             |      |                                  |               |
|                                                    | Clinical isolate's IDs | Actual MICs | <i>gyrA</i> (T83I) | <i>parC</i> (S87L) | <i>parE</i> | <i>nfxB</i> | <i>gyrB</i> | CrpP | Corresponding engineered mutants | Predicted MIC |
| 1.                                                 | 116                    | 0.05        | no                 | no                 | no          | no          | no          | no   | WT <i>gyrA</i>                   | S (<1)        |
| 2.                                                 | 122                    | 0.5         | no                 | no                 | no          | no          | no          | no   | WT <i>gyrA</i>                   | S (<1)        |
| 3.                                                 | 124                    | 0.125       | no                 | no                 | no          | no          | no          | no   | WT <i>gyrA</i>                   | S (<1)        |
| 4.                                                 | 125                    | 0.125       | no                 | no                 | no          | no          | no          | no   | WT <i>gyrA</i>                   | S (<1)        |
| 5.                                                 | 127                    | 0.25        | no                 | no                 | no          | no          | no          | no   | WT <i>gyrA</i>                   | S (<1)        |
| 6.                                                 | 130                    | 0.5         | no                 | no                 | no          | no          | no          | no   | WT <i>gyrA</i>                   | S (<1)        |
| 7.                                                 | 145                    | 0.5         | no                 | no                 | no          | no          | no          | no   | WT <i>gyrA</i>                   | S (<1)        |
| 8.                                                 | 146                    | 0.5         | no                 | no                 | no          | no          | no          | no   | WT <i>gyrA</i>                   | S (<1)        |
| 9.                                                 | 149                    | 0.5         | no                 | no                 | no          | no          | no          | no   | WT <i>gyrA</i>                   | S (<1)        |
| 10.                                                | 152                    | 0.125       | no                 | no                 | no          | no          | no          | no   | WT <i>gyrA</i>                   | S (<1)        |
| 11.                                                | 158                    | 0.25        | no                 | no                 | no          | no          | no          | no   | WT <i>gyrA</i>                   | S (<1)        |
| 12.                                                | 161                    | 0.25        | no                 | no                 | no          | no          | no          | no   | WT <i>gyrA</i>                   | S (<1)        |
| 13.                                                | 162                    | 0.25        | no                 | no                 | no          | no          | no          | no   | WT <i>gyrA</i>                   | S (<1)        |
| 14.                                                | 163                    | 0.5         | no                 | no                 | no          | no          | no          | no   | WT <i>gyrA</i>                   | S (<1)        |
| 15.                                                | 164                    | 0.05        | no                 | no                 | no          | no          | no          | no   | WT <i>gyrA</i>                   | S (<1)        |
| 16.                                                | 167                    | 0.125       | no                 | no                 | no          | no          | no          | no   | WT <i>gyrA</i>                   | S (<1)        |

|     |            |       |      |    |    |       |    |    |                |        |
|-----|------------|-------|------|----|----|-------|----|----|----------------|--------|
| 17. | 169        | 0.25  | no   | no | no | no    | no | no | WT <i>gyrA</i> | S (<1) |
| 18. | 171        | 0.5   | no   | no | no | no    | no | no | WT <i>gyrA</i> | S (<1) |
| 19. | 177        | 0.05  | no   | no | no | no    | no | no | WT <i>gyrA</i> | S (<1) |
| 20. | 178        | 0.25  | no   | no | no | no    | no | no | WT <i>gyrA</i> | S (<1) |
| 21. | 184        | 0.25  | T83A | no | no | no    | no | no | WT <i>gyrA</i> | S (<1) |
| 22. | 185        | 0.05  | no   | no | no | no    | no | no | WT <i>gyrA</i> | S (<1) |
| 23. | 186        | 0.5   | no   | no | no | no    | no | no | WT <i>gyrA</i> | S (<1) |
| 24. | <b>369</b> | 0.125 | no   | no | no | no    | no | no | WT <i>gyrA</i> | S (<1) |
| 25. | 688        | 0.25  | no   | no | no | no    | no | no | WT <i>gyrA</i> | S (<1) |
| 26. | 689        | 0.25  | no   | no | no | no    | no | no | WT <i>gyrA</i> | S (<1) |
| 27. | 690        | 0.5   | no   | no | no | no    | no | no | WT <i>gyrA</i> | S (<1) |
| 28. | 691        | 0.5   | no   | no | no | no    | no | no | WT <i>gyrA</i> | S (<1) |
| 29. | 692        | 0.25  | no   | no | no | no    | no | no | WT <i>gyrA</i> | S (<1) |
| 30. | 693        | 0.25  | no   | no | no | no    | no | no | WT <i>gyrA</i> | S (<1) |
| 31. | 694        | 0.25  | no   | no | no | no    | no | no | WT <i>gyrA</i> | S (<1) |
| 32. | 695        | 0.25  | no   | no | no | A170T | no | no | WT <i>gyrA</i> | S (<1) |
| 33. | 696        | 0.25  | no   | no | no | no    | no | no | WT <i>gyrA</i> | S (<1) |
| 34. | 698        | 0.25  | no   | no | no | no    | no | no | WT <i>gyrA</i> | S (<1) |
| 35. | 699        | 0.25  | no   | no | no | no    | no | no | WT <i>gyrA</i> | S (<1) |
| 36. | 703        | 0.25  | no   | no | no | no    | no | no | WT <i>gyrA</i> | S (<1) |
| 37. | 710        | 0.5   | no   | no | no | no    | no | no | WT <i>gyrA</i> | S (<1) |
| 38. | 714        | 0.5   | no   | no | no | no    | no | no | WT <i>gyrA</i> | S (<1) |
| 39. | 725        | 0.25  | no   | no | no | no    | no | no | WT <i>gyrA</i> | S (<1) |
| 40. | 727        | 0.25  | no   | no | no | no    | no | no | WT <i>gyrA</i> | S (<1) |

|     |     |      |    |    |    |    |    |    |                |        |
|-----|-----|------|----|----|----|----|----|----|----------------|--------|
| 41. | 728 | 0.25 | no | no | no | no | no | no | WT <i>gyrA</i> | S (<1) |
| 42. | 729 | 0.25 | no | no | no | no | no | no | WT <i>gyrA</i> | S (<1) |
| 43. | 730 | 0.25 | no | no | no | no | no | no | WT <i>gyrA</i> | S (<1) |
| 44. | 731 | 0.25 | no | no | no | no | no | no | WT <i>gyrA</i> | S (<1) |
| 45. | 733 | 0.25 | no | no | no | no | no | no | WT <i>gyrA</i> | S (<1) |
| 46. | 736 | 0.25 | no | no | no | no | no | no | WT <i>gyrA</i> | S (<1) |
| 47. | 738 | 0.5  | no | no | no | no | no | no | WT <i>gyrA</i> | S (<1) |
| 48. | 742 | 0.25 | no | no | no | no | no | no | WT <i>gyrA</i> | S (<1) |
| 49. | 749 | 0.25 | no | no | no | no | no | no | WT <i>gyrA</i> | S (<1) |
| 50. | 750 | 0.25 | no | no | no | no | no | no | WT <i>gyrA</i> | S (<1) |
| 51. | 751 | 0.25 | no | no | no | no | no | no | WT <i>gyrA</i> | S (<1) |
| 52. | 752 | 0.25 | no | no | no | no | no | no | WT <i>gyrA</i> | S (<1) |
| 53. | 754 | 0.25 | no | no | no | no | no | no | WT <i>gyrA</i> | S (<1) |
| 54. | 755 | 0.25 | no | no | no | no | no | no | WT <i>gyrA</i> | S (<1) |
| 55. | 757 | 0.25 | no | no | no | no | no | no | WT <i>gyrA</i> | S (<1) |
| 56. | 758 | 0.25 | no | no | no | no | no | no | WT <i>gyrA</i> | S (<1) |
| 57. | 759 | 0.25 | no | no | no | no | no | no | WT <i>gyrA</i> | S (<1) |
| 58. | 760 | 0.25 | no | no | no | no | no | no | WT <i>gyrA</i> | S (<1) |
| 59. | 761 | 0.25 | no | no | no | no | no | no | WT <i>gyrA</i> | S (<1) |
| 60. | 762 | 0.25 | no | no | no | no | no | no | WT <i>gyrA</i> | S (<1) |
| 61. | 769 | 0.25 | no | no | no | no | no | no | WT <i>gyrA</i> | S (<1) |
| 62. | 775 | 0.25 | no | no | no | no | no | no | WT <i>gyrA</i> | S (<1) |
| 63. | 780 | 0.5  | no | no | no | no | no | no | WT <i>gyrA</i> | S (<1) |
| 64. | 785 | 0.5  | no | no | no | no | no | no | WT <i>gyrA</i> | S (<1) |

|     |             |       |    |    |    |    |    |    |                |        |
|-----|-------------|-------|----|----|----|----|----|----|----------------|--------|
| 65. | 786         | 0.25  | no | no | no | no | no | no | WT <i>gyrA</i> | S (<1) |
| 66. | 790         | 0.25  | no | no | no | no | no | no | WT <i>gyrA</i> | S (<1) |
| 67. | 792         | 0.25  | no | no | no | no | no | no | WT <i>gyrA</i> | S (<1) |
| 68. | 796         | 0.25  | no | no | no | no | no | no | WT <i>gyrA</i> | S (<1) |
| 69. | 824         | 0.5   | no | no | no | no | no | no | WT <i>gyrA</i> | S (<1) |
| 70. | 828         | 0.25  | no | no | no | no | no | no | WT <i>gyrA</i> | S (<1) |
| 71. | 831         | 0.25  | no | no | no | no | no | no | WT <i>gyrA</i> | S (<1) |
| 72. | 856         | 0.25  | no | no | no | no | no | no | WT <i>gyrA</i> | S (<1) |
| 73. | 860         | 0.25  | no | no | no | no | no | no | WT <i>gyrA</i> | S (<1) |
| 74. | 867         | 0.25  | no | no | no | no | no | no | WT <i>gyrA</i> | S (<1) |
| 75. | 875         | 0.25  | no | no | no | no | no | no | WT <i>gyrA</i> | S (<1) |
| 76. | 877         | 0.25  | no | no | no | no | no | no | WT <i>gyrA</i> | S (<1) |
| 77. | 881         | 0.25  | no | no | no | no | no | no | WT <i>gyrA</i> | S (<1) |
| 78. | 884         | 0.25  | no | no | no | no | no | no | WT <i>gyrA</i> | S (<1) |
| 79. | 885         | 0.25  | no | no | no | no | no | no | WT <i>gyrA</i> | S (<1) |
| 80. | <b>1108</b> | 0.125 | no | no | no | no | no | no | WT <i>gyrA</i> | S (<1) |
| 81. | 1533        | 0.5   | no | no | no | no | no | no | WT <i>gyrA</i> | S (<1) |
| 82. | 1535        | 0.25  | no | no | no | no | no | no | WT <i>gyrA</i> | S (<1) |
| 83. | 1539        | 0.25  | no | no | no | no | no | no | WT <i>gyrA</i> | S (<1) |
| 84. | 1579        | 0.25  | no | no | no | no | no | no | WT <i>gyrA</i> | S (<1) |
| 85. | 1580        | 0.25  | no | no | no | no | no | no | WT <i>gyrA</i> | S (<1) |
| 86. | 1581        | 0.25  | no | no | no | no | no | no | WT <i>gyrA</i> | S (<1) |
| 87. | 1252420     | 0.064 | no | no | no | no | no | no | WT <i>gyrA</i> | S (<1) |
| 88. | 1254434     | 0.064 | no | no | no | no | no | no | WT <i>gyrA</i> | S (<1) |

|      |         |       |    |       |           |    |    |    |                |        |
|------|---------|-------|----|-------|-----------|----|----|----|----------------|--------|
| 89.  | 1265577 | 0.064 | no | no    | no        | no | no | no | WT <i>gyrA</i> | S (<1) |
| 90.  | 1271047 | 0.064 | no | no    | no        | no | no | no | WT <i>gyrA</i> | S (<1) |
| 91.  | 1275666 | 0.064 | no | no    | no        | no | no | no | WT <i>gyrA</i> | S (<1) |
| 92.  | 1280466 | 0.064 | no | no    | no        | no | no | no | WT <i>gyrA</i> | S (<1) |
| 93.  | 1301482 | 0.064 | no | no    | no        | no | no | no | WT <i>gyrA</i> | S (<1) |
| 94.  | 1313352 | 0.25  | no | no    | no        | no | no | no | WT <i>gyrA</i> | S (<1) |
| 95.  | 1417546 | 0.38  | no | no    | no        | no | no | no | WT <i>gyrA</i> | S (<1) |
| 96.  | 1419840 | 0.5   | no | no    | no        | no | no | no | WT <i>gyrA</i> | S (<1) |
| 97.  | 1459372 | 0.094 | no | no    | no        | no | no | no | WT <i>gyrA</i> | S (<1) |
| 98.  | 1679579 | 0.38  | no | no    | no        | no | no | no | WT <i>gyrA</i> | S (<1) |
| 99.  | 1292777 | 0.064 | no | no    | no        | no | no | no | WT <i>gyrA</i> | S (<1) |
| 100. | 120     | 1 (I) | no | no    | no        | no | no | no | WT <i>gyrA</i> | S (<1) |
| 101. | 121     | 1 (I) | no | no    | no        | no | no | no | WT <i>gyrA</i> | S (<1) |
| 102. | 128     | 1 (I) | no | no    | no        | no | no | no | WT <i>gyrA</i> | S (<1) |
| 103. | 129     | 1 (I) | no | no    | no        | no | no | no | WT <i>gyrA</i> | S (<1) |
| 104. | 133     | 1 (I) | no | no    | no        | no | no | no | WT <i>gyrA</i> | S (<1) |
| 105. | 170     | 1(I)  | no | no    | no        | no | no | no | WT <i>gyrA</i> | S (<1) |
| 106. | 715     | 1 (I) | no | no    | no        | no | no | no | WT <i>gyrA</i> | S (<1) |
| 107. | 720     | 1 (I) | no | no    | no        | no | no | no | WT <i>gyrA</i> | S (<1) |
| 108. | 782     | 1 (I) | no | no    | no        | no | no | no | WT <i>gyrA</i> | S (<1) |
| 109. | 880     | 1 (I) | no | no    | no        | no | no | no | WT <i>gyrA</i> | S (<1) |
| 110. | 1550    | 1 (I) | no | no    | no        | no | no | no | WT <i>gyrA</i> | S (<1) |
| 111. | 1564    | 1 (I) | no | N170S | R30C+H59R | no | no | no | WT <i>gyrA</i> | S (<1) |
| 112. | 1577    | 1 (I) | no | no    | no        | no | no | no | WT <i>gyrA</i> | S (<1) |

***gyrA* T83I and *parC* S87**

|     |             |    |          |     |       |    |    |     |                    |       |
|-----|-------------|----|----------|-----|-------|----|----|-----|--------------------|-------|
| 1.  | <b>89</b>   | >4 | yes      | yes | no    | no | no | no  | <i>gyrA + parC</i> | R (4) |
| 2.  | <b>664</b>  | >4 | yes      | yes | no    | no | no | no  | <i>gyrA + parC</i> | R (4) |
| 3.  | <b>669</b>  | >4 | yes      | yes | no    | no | no | no  | <i>gyrA + parC</i> | R (4) |
| 4.  | <b>706</b>  | >4 | yes      | yes | no    | no | no | no  | <i>gyrA + parC</i> | R (4) |
| 5.  | <b>718</b>  | >4 | yes      | yes | no    | no | no | no  | <i>gyrA + parC</i> | R (4) |
| 6.  | <b>871</b>  | >4 | yes      | yes | no    | no | no | yes | <i>gyrA + parC</i> | R (4) |
| 7.  | 1053        | 4  | yes      | yes | no    | no | no | no  | <i>gyrA + parC</i> | R (4) |
| 8.  | <b>1112</b> | >4 | yes      | yes | no    | no | no | no  | <i>gyrA + parC</i> | R (4) |
| 9.  | <b>1122</b> | 4  | yes+D87H | yes | E215Q | no | no | no  | <i>gyrA + parC</i> | R (4) |
| 10. | <b>1124</b> | >4 | yes      | yes | E215Q | no | no | no  | <i>gyrA + parC</i> | R (4) |
| 11. | <b>1130</b> | >4 | yes      | yes | no    | no | no | no  | <i>gyrA + parC</i> | R (4) |
| 12. | <b>1133</b> | 4  | yes      | yes | no    | no | no | no  | <i>gyrA + parC</i> | R (4) |
| 13. | <b>1152</b> | 4  | yes+D87N | yes | no    | no | no | yes | <i>gyrA + parC</i> | R (4) |
| 14. | 1182        | 4  | yes      | yes | no    | no | no | no  | <i>gyrA + parC</i> | R (4) |
| 15. | <b>1184</b> | 4  | yes      | yes | no    | no | no | no  | <i>gyrA + parC</i> | R (4) |
| 16. | <b>1241</b> | >4 | yes      | yes | no    | no | no | yes | <i>gyrA + parC</i> | R (4) |
| 17. | <b>1242</b> | >4 | yes      | yes | no    | no | no | yes | <i>gyrA + parC</i> | R (4) |
| 18. | <b>1243</b> | >4 | yes      | yes | no    | no | no | yes | <i>gyrA + parC</i> | R (4) |
| 19. | <b>1244</b> | >4 | yes      | yes | no    | no | no | yes | <i>gyrA + parC</i> | R (4) |
| 20. | <b>1245</b> | >4 | yes      | yes | no    | no | no | yes | <i>gyrA + parC</i> | R (4) |
| 21. | <b>1269</b> | 4  | yes      | yes | no    | no | no | no  | <i>gyrA + parC</i> | R (4) |
| 22. | 1255885     | R  | yes      | yes | no    | no | no | no  | <i>gyrA + parC</i> | R (4) |
| 23. | 1257147     | R  | yes      | yes | no    | no | no | no  | <i>gyrA + parC</i> | R (4) |

|                         |             |         |           |               |       |       |    |     |                    |       |
|-------------------------|-------------|---------|-----------|---------------|-------|-------|----|-----|--------------------|-------|
| 24.                     | 1260990     | R       | yes       | yes           | no    | no    | no | no  | <i>gyrA + parC</i> | R (4) |
| 25.                     | 1275655     | 6       | yes       | yes           | no    | no    | no | no  | <i>gyrA + parC</i> | R (4) |
| 26.                     | 1324459     | R       | yes       | yes           | no    | no    | no | no  | <i>gyrA + parC</i> | R (4) |
| 27.                     | 1344658     | R       | yes + D87 | yes           | no    | no    | no | no  | <i>gyrA + parC</i> | R (4) |
| 28.                     | 1420275     | R       | yes       | yes + S197L/E | no    | no    | no | no  | <i>gyrA + parC</i> | R (4) |
| 29.                     | 1586981     | R       | yes       | yes           | no    | no    | no | no  | <i>gyrA + parC</i> | R (4) |
| 30.                     | 1690076     | R       | yes       | yes + S197L/E | no    | no    | no | no  | <i>gyrA + parC</i> | R (4) |
| 31.                     | 1268230     | R       | yes + D87 | yes + L168Q   | no    | no    | no | Yes | <i>gyrA + parC</i> | R (4) |
| <b><i>gyrA</i> T83I</b> |             |         |           |               |       |       |    |     |                    |       |
| 1.                      | 179         | 1 (I)   | yes       | no            | no    | no    | no | no  | <i>gyrA</i> T83I   | I (1) |
| 2.                      | 797         | 1 (I)   | yes       | no            | no    | no    | no | no  | <i>gyrA</i> T83I   | I (1) |
| 3.                      | <b>1074</b> | 1 (I)   | yes       | no            | D142N | no    | no | no  | <i>gyrA</i> T83I   | I (1) |
| 4.                      | <b>1603</b> | 1 (I)   | yes       | no            | no    | no    | no | no  | <i>gyrA</i> T83I   | I (1) |
| 5.                      | 1266654     | 1.5     | yes       | no            | no    | no    | no | no  | <i>gyrA</i> T83I   | I (1) |
| 6.                      | 811         | 2 (R)   | yes       | no            | D142N | no    | no | no  | <i>gyrA</i> T83I   | I (1) |
| 7.                      | 852         | 2 (R)   | yes       | no            | no    | no    | no | no  | <i>gyrA</i> T83I   | I (1) |
| 8.                      | 858         | 2 (R)   | yes       | no            | no    | no    | no | no  | <i>gyrA</i> T83I   | I (1) |
| 9.                      | <b>934</b>  | 2 (R)   | yes       | no            | no    | no    | no | no  | <i>gyrA</i> T83I   | I (1) |
| 10.                     | <b>946</b>  | 2 (R)   | yes       | no            | no    | no    | no | no  | <i>gyrA</i> T83I   | I (1) |
| 11.                     | <b>948</b>  | 2 (R)   | yes       | no            | no    | no    | no | no  | <i>gyrA</i> T83I   | I (1) |
| 12.                     | <b>65</b>   | 0.5 (S) | yes       | no            | no    | A30V  | no | no  | <i>gyrA</i> T83I   | I (1) |
| 13.                     | 112         | 0.5 (S) | yes       | no            | no    | no    | no | no  | <i>gyrA</i> T83I   | I (1) |
| 14.                     | 143         | 0.5 (S) | yes       | no            | no    | A167D | no | no  | <i>gyrA</i> T83I   | I (1) |
| 15.                     | 174         | 0.5 (S) | yes       | no            | no    | no    | no | no  | <i>gyrA</i> T83I   | I (1) |

|                                                                                                               |            |         |      |    |       |                     |       |     |                           |        |
|---------------------------------------------------------------------------------------------------------------|------------|---------|------|----|-------|---------------------|-------|-----|---------------------------|--------|
| 16.                                                                                                           | 180        | 0.5 (S) | yes  | no | no    | no                  | no    | no  | <i>gyrA</i> T83I          | I (1)  |
| 17.                                                                                                           | 181        | 0.5 (S) | yes  | no | no    | no                  | no    | no  | <i>gyrA</i> T83I          | I (1)  |
| <b>WT <i>gyrA</i><sub>83</sub> in combination with other resistance alleles in <i>gyrB/nfxB/parC/parE</i></b> |            |         |      |    |       |                     |       |     |                           |        |
| 1.                                                                                                            | <b>37</b>  | 0.25    | no   | no | no    | R21H+<br>A168D+D56G | no    | no  | <i>nfxB</i> T39P          | S (<1) |
| 2.                                                                                                            | <b>38</b>  | 0.5     | no   | no | no    | R21H+A168D<br>+D56G | no    | no  | <i>nfxB</i> T39P          | S (<1) |
| 3.                                                                                                            | <b>88</b>  | 0.5     | D87N | no | yes   | R82L                | no    | no  | <i>gyrA</i> D87N          | S (<1) |
| 4.                                                                                                            | 723        | 0.25    | no   | no | no    | R21H+D56G           | no    | no  | <i>nfxB</i> T39P          | S (<1) |
| 5.                                                                                                            | 737        | 0.25    | no   | no | A473T | R21H                | no    | no  | <i>parE</i> + <i>nfxB</i> | S (<1) |
| 6.                                                                                                            | 740        | 0.25    | no   | no | no    | R21H+D56G           | no    | no  | <i>nfxB</i> T39P          | S (<1) |
| 7.                                                                                                            | <b>825</b> | 0.25    | no   | no | yes   | no                  | no    | no  | <i>parE</i>               | S (<1) |
| 8.                                                                                                            | <b>830</b> | 0.25    | no   | no | yes   | no                  | no    | no  | <i>parE</i>               | S (<1) |
| 9.                                                                                                            | 1578       | 0.25    | no   | no | no    | R82L                | no    | no  | <i>nfxB</i>               | S (<1) |
| 10.                                                                                                           | 111        | 0.5     | no   | no | no    | no                  | P749S | no  | <i>parE</i>               | S (<1) |
| 11.                                                                                                           | 113        | 0.5     | D87N | no | no    | no                  | no    | no  | <i>gyrA</i> D87N          | S (<1) |
| 12.                                                                                                           | 114        | 0.125   | D87N | no | no    | no                  | no    | no  | <i>gyrA</i> D87N          | S (<1) |
| 13.                                                                                                           | 115        | 0.125   | D87N | no | no    | no                  | no    | no  | <i>gyrA</i> D87N          | S (<1) |
| 14.                                                                                                           | 131        | 0.05    | D87Y | no | no    | no                  | no    | yes | <i>gyrA</i> D87N          | S (<1) |
| 15.                                                                                                           | 132        | 0.05    | D87Y | no | no    | no                  | no    | yes | <i>gyrA</i> D87N          | S (<1) |
| 16.                                                                                                           | 144        | 0.5     | no   | no | no    | no                  | P749S | no  | WT <i>gyrA</i>            | S (<1) |
| 17.                                                                                                           | 147        | 0.5     | no   | no | no    | no                  | P749S | no  | WT <i>gyrA</i>            | S (<1) |
| 18.                                                                                                           | 153        | 0.25    | no   | no | no    | no                  | P749S | no  | WT <i>gyrA</i>            | S (<1) |
| 19.                                                                                                           | 154        | 0.25    | no   | no | no    | no                  | P749S | no  | WT <i>gyrA</i>            | S (<1) |
| 20.                                                                                                           | 155        | 0.25    | no   | no | no    | no                  | P749S | no  | WT <i>gyrA</i>            | S (<1) |



|     |         |       |    |       |       |          |       |     |                |        |
|-----|---------|-------|----|-------|-------|----------|-------|-----|----------------|--------|
| 21. | 156     | 0.5   | no | no    | no    | no       | P749S | no  | WT <i>gyrA</i> | S (<1) |
| 22. | 157     | 0.5   | no | no    | no    | no       | P749S | no  | WT <i>gyrA</i> | S (<1) |
| 23. | 176     | 0.25  | no | no    | no    | Yes      | no    | no  | <i>nfxB</i>    | S (<1) |
| 24. | 182     | 0.5   | no | no    | no    | no       | P749S | no  | WT <i>gyrA</i> | S (<1) |
| 25. | 183     | 0.05  | no | no    | no    | no       | S466F | no  | WT <i>gyrA</i> | S (<1) |
| 26. | 734     | 0.25  | no | no    | E215Q | no       | no    | yes | WT <i>gyrA</i> | S (<1) |
| 27. | 744     | 0.25  | no | no    | no    | Del+E75G | no    | no  | WT <i>gyrA</i> | S (<1) |
| 28. | 747     | 0.25  | no | no    | no    | no       | no    | yes | WT <i>gyrA</i> | S (<1) |
| 29. | 748     | 0.25  | no | no    | no    | no       | no    | yes | WT <i>gyrA</i> | S (<1) |
| 30. | 756     | 0.25  | no | no    | no    | no       | no    | yes | WT <i>gyrA</i> | S (<1) |
| 31. | 776     | 0.25  | no | no    | no    | Del+E75G | no    | no  | WT <i>gyrA</i> | S (<1) |
| 32. | 789     | 0.25  | no | no    | no    | no       | no    | yes | WT <i>gyrA</i> | S (<1) |
| 33. | 878     | 0.25  | no | no    | no    | no       | no    | yes | WT <i>gyrA</i> | S (<1) |
| 34. | 1530    | 0.25  | no | no    | no    | no       | P749S | no  | WT <i>gyrA</i> | S (<1) |
| 35. | 1536    | 0.25  | no | no    | no    | no       | P749S | no  | WT <i>gyrA</i> | S (<1) |
| 36. | 1537    | 0.5   | no | no    | no    | no       | P749S | no  | WT <i>gyrA</i> | S (<1) |
| 37. | 1538    | 0.5   | no | no    | no    | no       | P749S | no  | WT <i>gyrA</i> | S (<1) |
| 38. | 1540    | 0.5   | no | no    | no    | no       | P749S | no  | WT <i>gyrA</i> | S (<1) |
| 39. | 1541    | 0.12  | no | no    | no    | no       | P749S | no  | WT <i>gyrA</i> | S (<1) |
| 40. | 1542    | 0.25  | no | no    | no    | no       | P749S | no  | WT <i>gyrA</i> | S (<1) |
| 41. | 1271954 | 0.064 | no | no    | A342V | no       | no    | no  | WT <i>gyrA</i> | S (<1) |
| 42. | 1279293 | 0.032 | no | T364A | no    | no       | no    | no  | WT <i>gyrA</i> | S (<1) |
| 43. | 1709299 | 0.125 | no | A421V | no    | no       | no    | no  | WT <i>gyrA</i> | S (<1) |
| 44. | 123     | 1 (I) | no | no    | no    | R82L     | no    | yes | WT <i>gyrA</i> | S (<1) |

|                                                                                                                                      |             |          |      |    |             |          |         |     |                                    |        |
|--------------------------------------------------------------------------------------------------------------------------------------|-------------|----------|------|----|-------------|----------|---------|-----|------------------------------------|--------|
| 45.                                                                                                                                  | <b>532</b>  | 1 (I)    | no   | no | A473V + 533 | no       | S466F   | no  | <i>parE</i>                        | S (<1) |
| 46.                                                                                                                                  | 810         | 1 (I)    | no   | no | no          | P22Q     | P749H   | no  | <i>nfxB</i>                        | S (<1) |
| 47.                                                                                                                                  | 117         | 1 (I)    | no   | no | no          | no       | S466F   | no  | WT <i>gyrA</i>                     | S (<1) |
| 48.                                                                                                                                  | 118         | 1 (I)    | no   | no | no          | no       | S466F   | no  | WT <i>gyrA</i>                     | S (<1) |
| 49.                                                                                                                                  | 119         | 1 (I)    | no   | no | no          | no       | S466F   | no  | WT <i>gyrA</i>                     | S (<1) |
| 50.                                                                                                                                  | 126         | 1 (I)    | D87N | no | no          | no       |         | no  | WT <i>gyrA</i>                     | S (<1) |
| 51.                                                                                                                                  | 148         | 1 (I)    | no   | no | no          | no       | R138H   | no  | WT <i>gyrA</i>                     | S (<1) |
| 52.                                                                                                                                  | 150         | 1 (I)    | no   | no | no          | no       | P749S   | no  | WT <i>gyrA</i>                     | S (<1) |
| 53.                                                                                                                                  | 151         | 1 (I)    | no   | no | no          | no       | P749S   | no  | WT <i>gyrA</i>                     | S (<1) |
| 54.                                                                                                                                  | 159         | 1 (I)    | no   | no | no          | no       | P749S   | no  | WT <i>gyrA</i>                     | S (<1) |
| 55.                                                                                                                                  | 713         | 1 (I)    | no   | no | no          | no       | S466Y   | yes | WT <i>gyrA</i>                     | S (<1) |
| 56.                                                                                                                                  | 1576        | 1 (I)    | no   | no | R30C+H59R   | no       | P749H   | no  | WT <i>gyrA</i>                     | S (<1) |
| 57.                                                                                                                                  | 1300097     | 1        | no   | no | no          | no       | S466F/Y | no  | <i>gyrB</i>                        | S (<1) |
| <b><i>gyrA</i><sub>T83I</sub> and <i>parE</i><sub>473/457/460/438</sub></b>                                                          |             |          |      |    |             |          |         |     |                                    |        |
| 1.                                                                                                                                   | <b>677</b>  | 2 (R)    | yes  | no | Yes (S457C) | no       | no      | no  | <i>gyrA + parE</i>                 | R (≥2) |
| 2.                                                                                                                                   | <b>954</b>  | 4 (R)    | yes  | no | P438S       | no       | no      | no  | <i>gyrA + parE</i>                 | R (≥2) |
| 3.                                                                                                                                   | <b>1594</b> | 2 (R)    | yes  | no | yes (S457C) | no       | no      | no  | <i>gyrA + parE</i>                 | R (≥2) |
| 4.                                                                                                                                   | 1295835     | R        | yes  | no | P438S       | no       | no      | no  | <i>gyrA + parE</i>                 | R (≥2) |
| <b><i>gyrA</i><sub>T83I</sub> + <i>nfxB</i> and <i>gyrA</i><sub>T83I</sub> + <i>nfxB</i> + <i>parE</i><sub>473/457/460/438</sub></b> |             |          |      |    |             |          |         |     |                                    |        |
| 1.                                                                                                                                   | 139         | 2 (R)    | yes  | no | yes         | R42C     | no      | no  | <i>gyrA + parE + nfxB</i>          | R (≥2) |
| 2.                                                                                                                                   | <b>1590</b> | 2 (R)    | yes  | no | no          | DEL+E75G | no      | no  | <i>gyrA</i> T83I + <i>nfxB</i> del | R (≥2) |
| 3.                                                                                                                                   | <b>1506</b> | 1.25 (I) | yes  | no | no          | no       | no      | yes | <i>gyrA</i> T83I                   | I (1)  |

|                                                                                                                                    |         |       |     |           |           |          |    |    |                                         |                |
|------------------------------------------------------------------------------------------------------------------------------------|---------|-------|-----|-----------|-----------|----------|----|----|-----------------------------------------|----------------|
| 4.                                                                                                                                 | 1449019 | 8     | yes | no        | no        | R82L/H/E | no | no | <i>gyrA</i> + <i>nfxB</i>               | R ( $\geq 2$ ) |
| 5.                                                                                                                                 | 1586994 | R     | yes | yes       | no        | D138Y    | no | no | <i>gyrA</i> + <i>parC</i> + <i>nfxB</i> | R ( $\geq 2$ ) |
| <b>Isolates with actual MICs higher than predicted MICs</b>                                                                        |         |       |     |           |           |          |    |    |                                         |                |
| <b>No resistance allele in <i>gyrA</i><sub>83</sub>/<i>nfxB</i>/<i>parC</i><sub>87</sub>/<i>parE</i><sub>473/457/460/438</sub></b> |         |       |     |           |           |          |    |    |                                         |                |
| 1.                                                                                                                                 | 700     | 2 (R) | no  | no        | no        | no       | no | no | WT <i>gyrA</i>                          | S (<1)         |
| 2.                                                                                                                                 | 826     | 4 (R) | no  | no        | no        | no       | no | no | WT <i>gyrA</i>                          | S (<1)         |
| 3.                                                                                                                                 | 838     | 2 (R) | no  | no        | no        | no       | no | no | WT <i>gyrA</i>                          | S (<1)         |
| 4.                                                                                                                                 | 879     | 4 (R) | no  | no        | no        | no       | no | no | WT <i>gyrA</i>                          | S (<1)         |
| 5.                                                                                                                                 | 1532    | 2 (R) | no  | N170S     | no        | no       | no | no | WT <i>gyrA</i>                          | S (<1)         |
| 6.                                                                                                                                 | 1534    | 2 (R) | no  | no        | no        | no       | no | no | WT <i>gyrA</i>                          | S (<1)         |
| 7.                                                                                                                                 | 1543    | 2 (R) | no  | no(N170S) | no        | no       | no | no | WT <i>gyrA</i>                          | S (<1)         |
| 8.                                                                                                                                 | 1544    | 2 (R) | no  | no(N170S) | R30C+H59R | no       | no | no | WT <i>gyrA</i>                          | S (<1)         |
| 9.                                                                                                                                 | 1545    | 2 (R) | no  | no(N170S) | no        | no       | no | no | WT <i>gyrA</i>                          | S (<1)         |
| 10.                                                                                                                                | 1546    | 2 (R) | no  | no        | no        | no       | no | no | WT <i>gyrA</i>                          | S (<1)         |
| 11.                                                                                                                                | 1548    | 2 (R) | no  | no        | no        | no       | no | no | WT <i>gyrA</i>                          | S (<1)         |
| 12.                                                                                                                                | 1549    | 2 (R) | no  | No        | R30C+H59R | no       | no | no | WT <i>gyrA</i>                          | S (<1)         |
| 13.                                                                                                                                | 1551    | 2 (R) | no  | No        | no        | no       | no | no | WT <i>gyrA</i>                          | S (<1)         |
| 14.                                                                                                                                | 1553    | 2 (R) | no  | No        | R30C+H59R | no       | no | no | WT <i>gyrA</i>                          | S (<1)         |
| 15.                                                                                                                                | 1554    | 2 (R) | no  | No        | no        | no       | no | no | WT <i>gyrA</i>                          | S (<1)         |
| 16.                                                                                                                                | 1555    | 2 (R) | no  | No        | no        | no       | no | no | WT <i>gyrA</i>                          | S (<1)         |
| 17.                                                                                                                                | 1557    | 2 (R) | no  | N170S     | no        | no       | no | no | WT <i>gyrA</i>                          | S (<1)         |
| 18.                                                                                                                                | 1558    | 2 (R) | no  | N170S     | R30C+H59R | no       | no | no | WT <i>gyrA</i>                          | S (<1)         |
| 19.                                                                                                                                | 1559    | 2 (R) | no  | No        | no        | no       | no | no | WT <i>gyrA</i>                          | S (<1)         |

|                                                                                                                                |             |        |      |       |           |             |         |     |                  |          |
|--------------------------------------------------------------------------------------------------------------------------------|-------------|--------|------|-------|-----------|-------------|---------|-----|------------------|----------|
| 20.                                                                                                                            | 1560        | 2 (R)  | no   | No    | no        | no          | no      | no  | WT <i>gyrA</i>   | S (<1)   |
| 21.                                                                                                                            | 1561        | 2 (R)  | no   | N170S | R30C+H59R | no          | no      | no  | WT <i>gyrA</i>   | S (<1)   |
| 22.                                                                                                                            | 1563        | 2 (R)  | no   | N170S | R30C+H59R | no          | no      | no  | WT <i>gyrA</i>   | S (<1)   |
| 23.                                                                                                                            | 1565        | 2 (R)  | no   | N170S | R30C+H59R | no          | no      | no  | WT <i>gyrA</i>   | S (<1)   |
| 24.                                                                                                                            | 1582        | 2 (R)  | no   | no    | no        | no          | no      | no  | WT <i>gyrA</i>   | S (<1)   |
| <b>WT <i>gyrA</i><sub>83</sub> in combination with resistance alleles in <i>gyrB/nfxB/parC/parE</i> or <i>crpP</i> present</b> |             |        |      |       |           |             |         |     |                  |          |
| 1.                                                                                                                             | 168         | 2 (R)  | no   | no    | no        | <b>R82L</b> | no      | no  | WT <i>gyrA</i>   | S (<1)   |
| 2.                                                                                                                             | 1547        | 2 (R)  | no   | no    | no        | no          | no      | yes | WT <i>gyrA</i>   | S (<1)   |
| 3.                                                                                                                             | 1562        | 2 (R)  | no   | N170S | R30C+H59R | no          | no      | yes | WT <i>gyrA</i>   | S (<1)   |
| 4.                                                                                                                             | 135         | 2 (R)  | D87N | no    | no        | no          | no      | no  | <i>gyrA</i> D87N | S (0.25) |
| 5. )                                                                                                                           | 1423253     | 3 (R)  | no   | no    | no        | R163P       | S466F/Y | no  | <i>gyrB</i>      | S (<1)   |
| 6.                                                                                                                             | 1281476     | 3 (R)  | no   | no    | no        | no          | P749S   | no  | <i>gyrB</i>      | S (<1)   |
| <b>Only <i>gyrA</i></b>                                                                                                        |             |        |      |       |           |             |         |     |                  |          |
| 1.                                                                                                                             | 166         | 8 (R)  | yes  | no    | no        | no          | no      | no  | <i>gyrA</i> T83I | 1 (I)    |
| 2.                                                                                                                             | 175         | 4 (R)  | yes  | no    | no        | no          | no      | no  | <i>gyrA</i> T83I | 1 (I)    |
| 3.                                                                                                                             | <b>976</b>  | 4 (R)  | yes  | no    | no        | no          | no      | no  | <i>gyrA</i> T83I | 1 (I)    |
| 4.                                                                                                                             | <b>1180</b> | 4 (R)  | yes  | no    | no        | no          | no      | no  | <i>gyrA</i> T83I | 1 (I)    |
| 5.                                                                                                                             | 1271701     | 1.5    | D87N | no    | no        | no          | no      | no  | <i>gyrA</i> D87N | S (<1)   |
| 6.                                                                                                                             | 1257763     | 12 (R) | D87N | no    | no        | no          | no      | no  | <i>gyrA</i> D87N | S (<1)   |
| <b><i>gyrA</i> T83I and <i>parC</i></b>                                                                                        |             |        |      |       |           |             |         |     |                  |          |
| 1.                                                                                                                             | 1272032     | 24 (R) | yes  | yes   | no        | no          | no      | no  |                  | R (4)    |
| <b><i>gyrA</i> T83I, <i>nfxB</i>, <i>parC</i></b>                                                                              |             |        |      |       |           |             |         |     |                  |          |
| 1.                                                                                                                             | 1607533     | 12 (R) | yes  | yes   | no        | R82L        | no      | no  |                  | 4 (R)    |

**Isolates with actual MIC less than predicted MIC**

**Only *gyrA*<sub>T83I</sub>**

|    |            |          |     |    |    |       |    |    |                  |       |
|----|------------|----------|-----|----|----|-------|----|----|------------------|-------|
| 1. | <b>66</b>  | 0.25 (S) | yes | no | no | A30V  | no | no | <i>gyrA</i> T83I | I (1) |
| 2. | <b>142</b> | 0.25 (S) | yes | no | no | A167D | no | no | <i>gyrA</i> T83I | I (1) |
| 3. | <b>172</b> | 0.05 (S) | yes | no | no | no    | no | no | <i>gyrA</i> T83I | I (1) |
| 4. | <b>173</b> | 0.05 (S) | yes | no | no | no    | no | no | <i>gyrA</i> T83I | I (1) |
| 5. | <b>977</b> | 0.25 (S) | yes | no | no | no    | no | no | <i>gyrA</i> T83I | I (1) |

***gyrA* T83I + *parE*+*nfxB***

|    |             |           |     |    |       |       |    |     |                                |        |
|----|-------------|-----------|-----|----|-------|-------|----|-----|--------------------------------|--------|
| 1. | <b>141</b>  | 0.05 (S)  | yes | no | T562A | A167D | no | no  | <i>gyrA</i> T83I               | I (1)  |
| 2. | <b>534</b>  | 0.5 (S)   | yes | no | yes   | no    | no | no  | <i>gyrA</i> + <i>parE</i>      | R (2)  |
| 3. | 140         | 1 (I)     | yes | no | yes   | R42C  | no | yes | <i>gyrA</i> T83I + <i>nfxB</i> | R (≥2) |
| 4. | <b>1296</b> | 0.125 (S) | yes | no |       | Del   | no | no  | <i>gyrA</i> T83I               | I (1)  |

***gyrA* T83I + *parC* S87L**

|    |           |           |     |     |    |    |    |    |                           |       |
|----|-----------|-----------|-----|-----|----|----|----|----|---------------------------|-------|
| 1. | <b>90</b> | 0.125 (S) | yes | yes | no | no | no | no | <i>gyrA</i> + <i>parC</i> | R (4) |
|----|-----------|-----------|-----|-----|----|----|----|----|---------------------------|-------|

**Table S8. Primers used\***

| Genes                                                                                         | Primer Sequences (5' to 3')                                        | Restriction enzymes | *Genome coordinates | References |
|-----------------------------------------------------------------------------------------------|--------------------------------------------------------------------|---------------------|---------------------|------------|
| <i>gyrA</i>                                                                                   | CCCCCGGATCCGCCTGGTCAATCGCATCTAC<br>CCCCCAAGCTTGGTCGGCGAACTCTTGAT   | BamHI<br>HindIII    | 3559924-3558007     | This study |
| <i>rnfC</i>                                                                                   | CCCCCGGATCCGCCTTTTCCCTGGTACTGGT<br>CCCCCAAGCTTATGCAATCGAACAGGTTGTG | BamHI<br>HindIII    | 3907697-3909637     |            |
| <i>nfxB</i>                                                                                   | GGGGGGATCCAGGATCGCTGGTTGTC<br>GGGGAAGCTTGGGTCGAGGCAATAGTGGTA       | BamHI<br>HindIII    | 5154491-5156819     |            |
| <i>parC</i>                                                                                   | CCCCCGGATCCGTTGGGGGACAAGTGACG<br>CCCCCAAGCTTAGGTTGAGGAAGGCGATCA    | BamHI<br>HindIII    | 5575013-5573327     |            |
| <i>parE</i>                                                                                   | CCCCCTCTAGAGCTGGGTGAATTCGAGTTGT<br>CCCCCAAGCTTGGCTATCTCGAGGAGGATCA | XbaI<br>HindIII     | 5574535-5579100     |            |
| <b>Primers used for amplification of mutation-containing DNA region</b>                       |                                                                    |                     |                     |            |
| Gene                                                                                          | Primer Sequences (5' to 3')                                        | Product Size (bp)   | *Genome coordinates | References |
| <i>gyrA</i><br>(3558951)                                                                      | TCGAAGACGAGCTGAAACAG<br>GCTCATCGACGGTCAGGT                         | 565                 | 3558577- 3559142    | This study |
| <i>nfxB</i><br>(5155675)                                                                      | ATGACCCTGATTTCCCATGA<br>CATCGACCATGCCGTAGAC                        | 453                 | 5155561-5156014     |            |
| <i>parC</i><br>(5574227)                                                                      | CCGATTCCAAGCACAAGAA<br>GACTTCCCGCAGGTTGTG                          | 379                 | 5573902-5574281     |            |
| <i>parE</i><br>(5576539)                                                                      | AGGTCGAGCGCAAGAAGA<br>TCGTCGAGGGCGTAGTAGAT                         | 451                 | 5576750- 5576299    |            |
| <i>rnfC</i><br>(3908671)                                                                      | GTA CTCAAGGGCCAGACCAT<br>CCACCAGCGTATGGATCTTT                      | 302                 | 3908577- 3908879    |            |
| <b>List of primers used to carry out RT-qPCR for expression analysis of genes <i>mexD</i></b> |                                                                    |                     |                     |            |
| Gene                                                                                          | Sequences                                                          | Product size        | Reference           |            |
| <i>clpX</i>                                                                                   | GTGGGCGAGGTCGAGAAC<br>CGGTACCCTCGATGAGCTTCAG                       | 200                 | (7)                 |            |
| <i>oprL</i>                                                                                   | CCAACAGCG GTGCCGTTGA<br>GCCATATTGTA CTGCGGGT                       | 200                 | (7)                 |            |
| <i>mexD</i>                                                                                   | CGAGCGCTATTCGCTGC<br>GGCAGTTGCACGTCGA                              | 165                 | (8)                 |            |

\*Restriction sites in the primer sequences are shown in bold text. Genome coordinates for expected amplified DNA region based on reference PAO1 genome (NCBI NC\_002516.2).

**Table S9.** Plasmids used.

| Plasmid                                | Description                                                                                                               | Reference |
|----------------------------------------|---------------------------------------------------------------------------------------------------------------------------|-----------|
| pEX18Tc                                | Suicide vector with tetracycline resistance, <i>oriT</i> and <i>sacB</i> gene                                             | (9)       |
| pEX18Tc:: <i>gyrA</i> <sub>T83I</sub>  | pEX18Tc containing 1917bp DNA fragment with mutation that encodes amino acid T instead of I at residue 83 in GyrA         |           |
| pEX18Tc:: <i>gyrA</i> <sub>D87G</sub>  | pEX18Tc containing 1917bp DNA fragment with mutation that encodes amino acid D instead of G at residue 87 in GyrA         |           |
| pEX18Tc:: <i>gyrA</i> <sub>D87N</sub>  | pEX18Tc containing 1917bp DNA fragment with mutation that encodes amino acid D instead of N at residue 87 in GyrA         |           |
| pEX18Tc:: <i>nfxB</i> <sub>T39P</sub>  | pEX18Tc containing 2328 bp DNA fragment with mutation that encodes amino acid T instead of P at residue 39 in NfxB        |           |
| pEX18Tc:: <i>rnfC</i> <sub>H87P</sub>  | pEX18Tc containing 1940 bp DNA fragment with mutation that encodes amino acid H instead of P at residue 87 in <i>rnfC</i> |           |
| pEX18Tc:: <i>parC</i> <sub>S87L</sub>  | pEX18Tc containing 1686 bp DNA fragment with mutation that encodes amino acid S instead of L at residue 87 in ParC        |           |
| pEX18Tc:: <i>parE</i> <sub>V460G</sub> | pEX18Tc containing 4565 bp DNA fragment with mutation that encodes amino acid V instead of G at residue 460 in ParE       |           |
| pEX18Tc::WT <i>rnfC</i>                | pEX18Tc containing 1755 bp DNA fragment from <i>rnfC</i> gene                                                             |           |
| pEX18Tc:: WT <i>gyrA</i>               | pEX18Tc containing 1917 bp DNA fragment from <i>gyrA</i> gene                                                             |           |

**Supplementary material references**

1. Wardell SJT, Rehman A, Martin LW, Winstanley C, Patrick WM, Lamont IL. 2019. A large-scale whole-genome comparison shows that experimental evolution in response to antibiotics predicts changes in naturally evolved clinical *Pseudomonas aeruginosa*. Antimicrob Agents Chemother 63:e01619–19.
2. Freschi L, Vincent AT, Jeukens J, Emond-Rheault JG, Kukavica-Ibrulj I, Dupont MJ, Charette SJ, Boyle B, Levesque RC. 2019. The *Pseudomonas aeruginosa* pan-genome provides new insights on its population structure, horizontal gene transfer, and pathogenicity. Genome Biol Evol 11:109-120.
3. Freschi L, Bertelli C, Jeukens J, Moore MP, Kukavica-Ibrulj I, Emond-Rheault JG, Hamel J, Fothergill JL, Tucker NP, McClean S, Klockgether J, de Soyza A, Brinkman FSL, Levesque RC,

- Winstanley C. 2018. Genomic characterisation of an international *Pseudomonas aeruginosa* reference panel indicates that the two major groups draw upon distinct mobile gene pools. *FEMS Microbiol Lett* 365.
4. Jeukens J, Freschi L, Kukavica-Ibrulj I, Emond-Rheault JG, Tucker NP, Levesque RC. 2019. Genomics of antibiotic-resistance prediction in *Pseudomonas aeruginosa*. *Ann N Y Acad Sci* 1435:5-17.
  5. Thrane SW, Taylor VL, Lund O, Lam JS, Jelsbak L. 2016. Application of whole-genome sequencing data for O-specific antigen analysis and in silico serotyping of *Pseudomonas aeruginosa* isolates. *Journal of clinical microbiology* 54:1782-1788.
  6. Bianconi I, D'Arcangelo S, Esposito A, Benedet M, Piffer E, Dinnella G, Gualdi P, Schinella M, Baldo E, Donati C, Jousson O. 2018. Persistence and microevolution of *Pseudomonas aeruginosa* in the cystic fibrosis lung: A single-patient longitudinal genomic study. *Front Microbiol* 9:3242.
  7. Konings AF, Martin LW, Sharples KJ, Roddam LF, Latham R, Reid DW, Lamont IL. 2013. *Pseudomonas aeruginosa* uses multiple pathways to acquire iron during chronic infection in cystic fibrosis lungs. *Infect Immun* 81:2697-2704.
  8. Xavier DE, Picão RC, Girardello R, Fehlberg LC, Gales AC. 2010. Efflux pumps expression and its association with porin down-regulation and beta-lactamase production among *Pseudomonas aeruginosa* causing bloodstream infections in Brazil. *BMC Microbiol* 10:217.
  9. Hoang TT, Karkhoff-Schweizer RR, Kutchma AJ, Schweizer HP. 1998. A broad-host-range Flp-FRT recombination system for site-specific excision of chromosomally-located DNA sequences: application for isolation of unmarked *Pseudomonas aeruginosa* mutants. *Gene* 212:77-86.
